# Supplementary material for: RILP interacts with HOPS complex via VPS41 subunit to regulate endocytic trafficking
Source: PubMed Central journal article supplement — Sci Rep. 2014 Dec 2;4:7282. doi: 10.1038/srep07282 (PMC4250914; doi:10.1038/srep07282), 2014-12-02

**RILP interacts with HOPS complex via VPS41 subunit to regulate endocytic trafficking**

Xiaosi Lin<sup>\*\*†</sup>, Ting Yang<sup>\*†</sup>, Shicong Wang<sup>\*</sup>, Zhen Wang<sup>\*</sup>, Ye Yun<sup>\*</sup>, Lixiang Sun<sup>\*</sup>, Yunhe Zhou<sup>\*</sup>,  
Xiaohui Xu<sup>\*</sup>, Chihiro Akazawa<sup>†</sup>, Wanjin Hong<sup>\*‡§</sup>, Tuanlao Wang<sup>\*§</sup>

<sup>\*</sup> State Key Laboratory of Cellular Stress Biology, School of Pharmaceutical Sciences, Xiamen University, Xiamen, Fujian, China, 361005

<sup>†</sup> Department of Biophysics and Biochemistry, Graduate School of Health Sciences, Tokyo Medical and Dental University, Yushima 1-5-45, Bunkyo-Ku, Tokyo 113-8519, Japan

<sup>‡</sup> Institute of Molecular and Cell Biology, A\*STAR (Agency for Science, Technology and Research), 61 Biopolis Drive, Singapore 138673, Singapore

<sup>†</sup> These authors contributed equally.

<sup>§</sup> To whom correspondence: Wanjin Hong, Institute of Molecular and Cell Biology, A\*STAR (Agency for Science, Technology and Research), 61 Biopolis Drive, Singapore 138673, Singapore, E-mail: mcbhwj@imcb.a-star.edu.sg, or Tuanlao Wang, School of Pharmaceutical Sciences, Xiamen University, Xiamen, Fujian Province, China, 361005, E-mail: xmuibrwtl@xmu.edu.cn.

## Supplemental data

### Figure s1

Hela cells were co-transfected with GFP-Rab7 and myc-tagged VPS11, VPS16, VPS18, VPS33, VPS39 and VPS41, respectively. Immunofluorescence microscopy revealed that Rab7 does not recruit HOPS subunits efficiently. Bar=20 $\mu$ m

### Figure s2

Hela cells were co-transfected with GFP-RILP and myc-tagged human VPS11, VPS16, VPS18, VPS39 and VPS41, respectively. The cells were processed for Immunofluorescence microscopy. Anti-CD63 was used to label the late endosomes/lysosomes followed by Cy5 conjugated secondary antibody, VPS proteins are immuno-labeled by 9E10 antibody followed by Texas-red conjugated secondary antibody and viewed along with GFP signal. The results demonstrated that RILP can recruit HOPS subunits to the membrane of late endosomes/lysosomes. Bar=20 $\mu$ m.

### Figure s3

Since there are not good commercial antibodies against HOPS subunits, we detect the knockdown efficiency of shRNA-VPS by examining the mRNA level of the indicated genes. mRNA was extracted using Trizol reagent (Invitrogen, California, USA), and converted to single strain cDNA according to HiFi-MMLV cDNA Kit (CW BIO, Beijing, China). The primer 1 (5'-ATCTTTGCCAATAACCCG-3') and primer 2 (5'-ACCATCCTGGAAGTCGTG-3'), primer 3 (5'-TGCTGTTCGGGACTA TCAC-3') and primer 4 (5'-TCCTTCTGTTGCACCTTGT-3'), primer 5 (5'-CTTACCACTGTCAGCACGAGG-3') and primer 6 (5'-ACAGCAGGTAGTTGTGGATGG-3'), primer 7 (5'-ACATTACGCCTCTG GATGG-3') and primer 8 (5'-TTCTCCCGTT GACGTTTC-3'), primer 9 (5'-AGCACCAGCCTCCCTACAT-3') and primer 10(5'-GCAGAGCCAATTCAAAC-3'), primer 11(5'- GACATCATCCAGCCAC TT-3') and primer 12(5'-CTGCCATCAATGCTTCT -3'), were used for PCR to detect the level of transcript of VPS11, VPS16, VPS18, VPS33, VPS39 and VPS41, respectively. primer 13 (5'-ACCACAGTCCATGCCATCAC-3') and primer 14(5'-TCCACCACCCTGTTGCTGTA-3') were used for detect the level of G3PDH for control. The results indicated that the mRNA level of the correspondent HOPS subunit was significantly reduced.

### Figure s4

Immunofluorescence microscopy revealed that sequentially depleting HOPS subunit, VPS11, VPS16, VPS18 or VPS39, does not interfere the co-localization of RILP with other HOPS subunits, respectively. Bar=20 $\mu$ m

### Figure s5

Immunofluorescence microscopy revealed the signals of EGF-Rhodamine haven't much difference in control cells, VPS41-knockdown cells and VPS41(428-855) over-expressing cells after short time of endocytosis (5 min). Bar=20 $\mu$ m

**Figure s6**

A. MCF cells stably expressing shRNA-VPS41 were transfected with pCMV-myc-VPS11, VPS18, VPS33, VPS39 and VPS35, respectively. The resulted cell lysates were subjected to immuno-precipitation assay using anti-VPS16 antibody, the results demonstrated that loss of VPS41 inhibits the interaction of VPS16 with VPS11 and VPS39, suggesting that loss of VPS41 potentially affects the stability of HOPS complex. B. the relative loading amount of corresponding proteins in A. VPS35 serves as control.

**Figure s7**

A. HeLa cell lysates derived from cells expressing myc-tagged HOPS subunits, VPS11, VPS16, VPS18, VPS33, VPS39 and VPS41, respectively, were subjected to GST-pulldown assay using immobilized GST-RILP. 9E10 antibody was used for western-blotting to detect the protein bound to GST-RILP. The results revealed that RILP binds to all HOPS subunits except for VPS33, suggesting RILP interacts with HOPS complex. B. GST-pulldown assay using GST-RILP, GST-RILP (1-198) and GST-RILP(199-401) demonstrated that N-terminal region (1-198aa) of RILP interacts with HOPS complex.

**Figure s8**

A. HeLa cells were transfected with pSuper.GFP-scramble-shRNA(lane 1) or shRNA-Rab7. 48h later, knocked-down cells were transfected with myc-tagged VPS11 (lane 2), VPS16 (lane 3), VPS18 (lane 4), VPS39 (lane 5) and VPS41 (lane 6), respectively. 72h later, cells were harvested and processed for detection of the knockdown efficiency. The results revealed that Rab7 was depleted efficiently in the cells expressing HOPS subunits. B. Cell lysates described above were subjected for GST-pulldown assay using GST-RILP, the results demonstrated that RILP can still bind to HOPS subunits when Rab7 was effectively depleted, suggesting RILP interacts with HOPS complex independent of Rab7. C. HeLa lysates containing myc-tagged VPS11, VPS16, VPS18, VPS39 and VPS41 were subjected for GST-pulldown assay using GST-RILP and GST-RILP304AAA306 mutant (not interacting with Rab7), the data showed that this RILP mutant can still bind to HOPS subunits, although no longer interacting with Rab7 (bottom panel). D. HeLa lysates containing myc-tagged VPS11, VPS16, VPS18, VPS33, VPS39 and VPS41 were subjected for GST-pulldown assay using GST-Rab7 or GST-Rab7L8A mutant (not interacting with RILP showed in bottom panel). The results indicating, like wildtype Rab7, Rab7L8A can still weakly interact with HOPS complex, suggesting Rab7 interacts with HOPS complex independent of RILP.

**Figure s9**

GST-pulldown experiments demonstrated that depletion of VPS41 decreases the amount of HOPS subunits bound to RILP.

**Figure s10**

A. Pulldown experiments showed that RILP specifically binds to VPS41 through its C-terminal region(428-855aa). B. Purified His-VPS41 or His-Vps33 recombinant protein was incubated with immobilized GST-RILP to show RILP directly interacts with VPS41, but not VPS33.

**Figure s11**

MCF7 cells were transfected with pSuper.GFP-scramble-shRNA or shRNA-VPS41, 48h later, the cells were starved for overnight, then stimulated with EGF for the indicated time. The protein level of EGFR was examined by western-blot using mAb against EGFR. The results demonstrated EGFR decreased quickly in scramble knocked-down cells, but the degradation of EGFR is compromised in shRNA-VPS41 knocked-down cells.

Figure s1

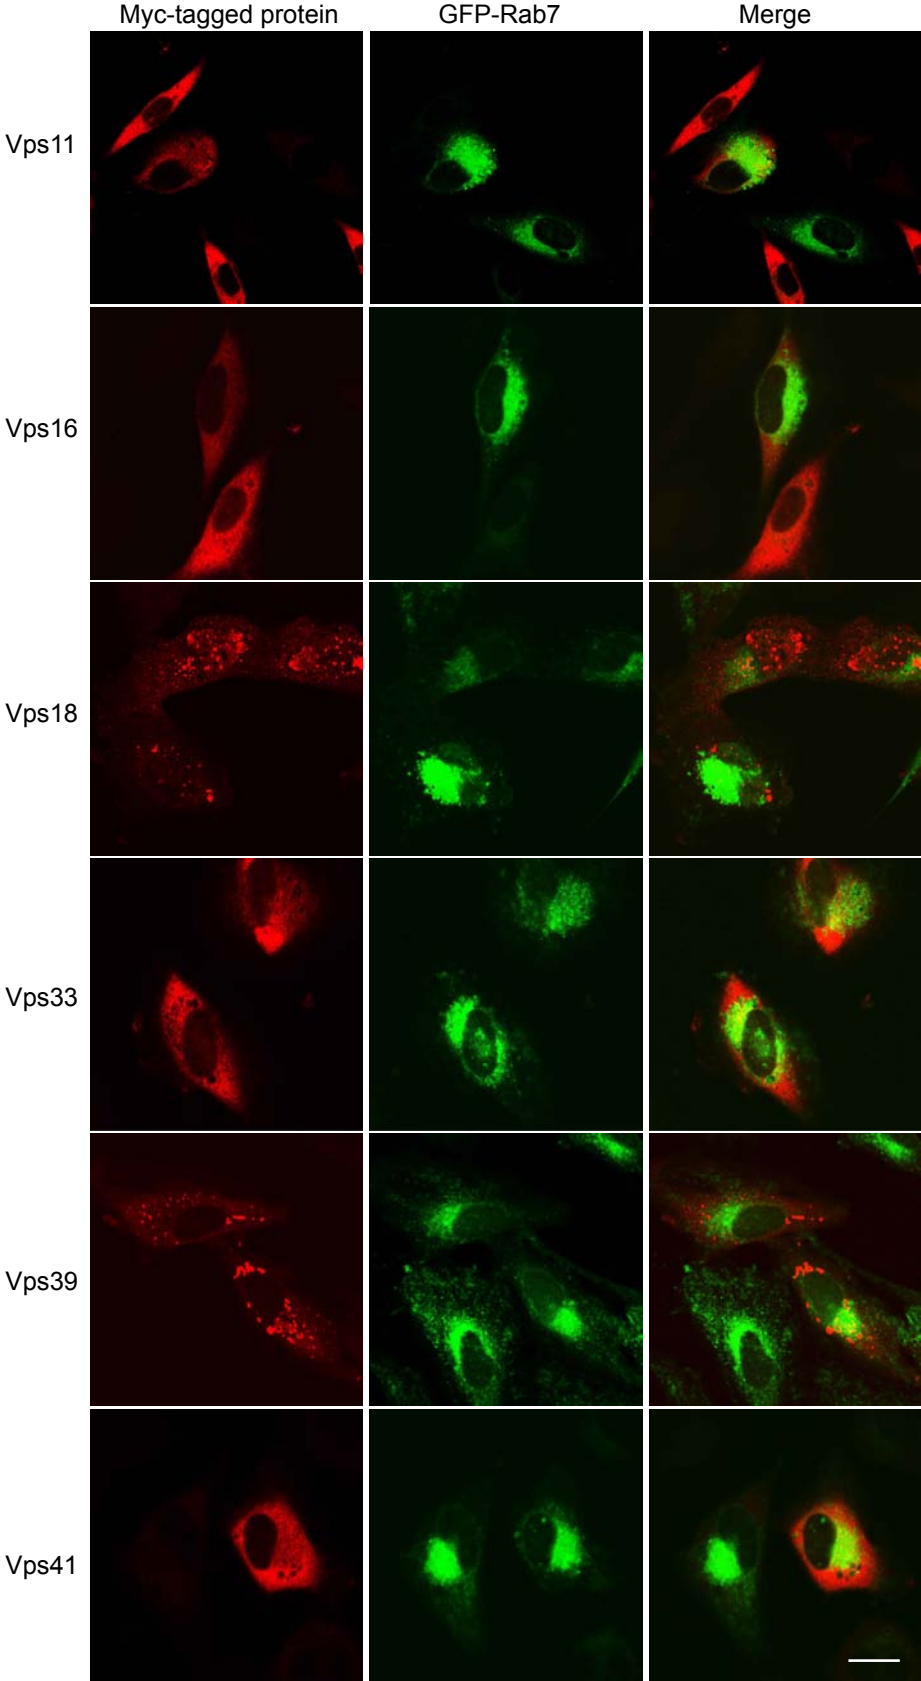

Figure s2

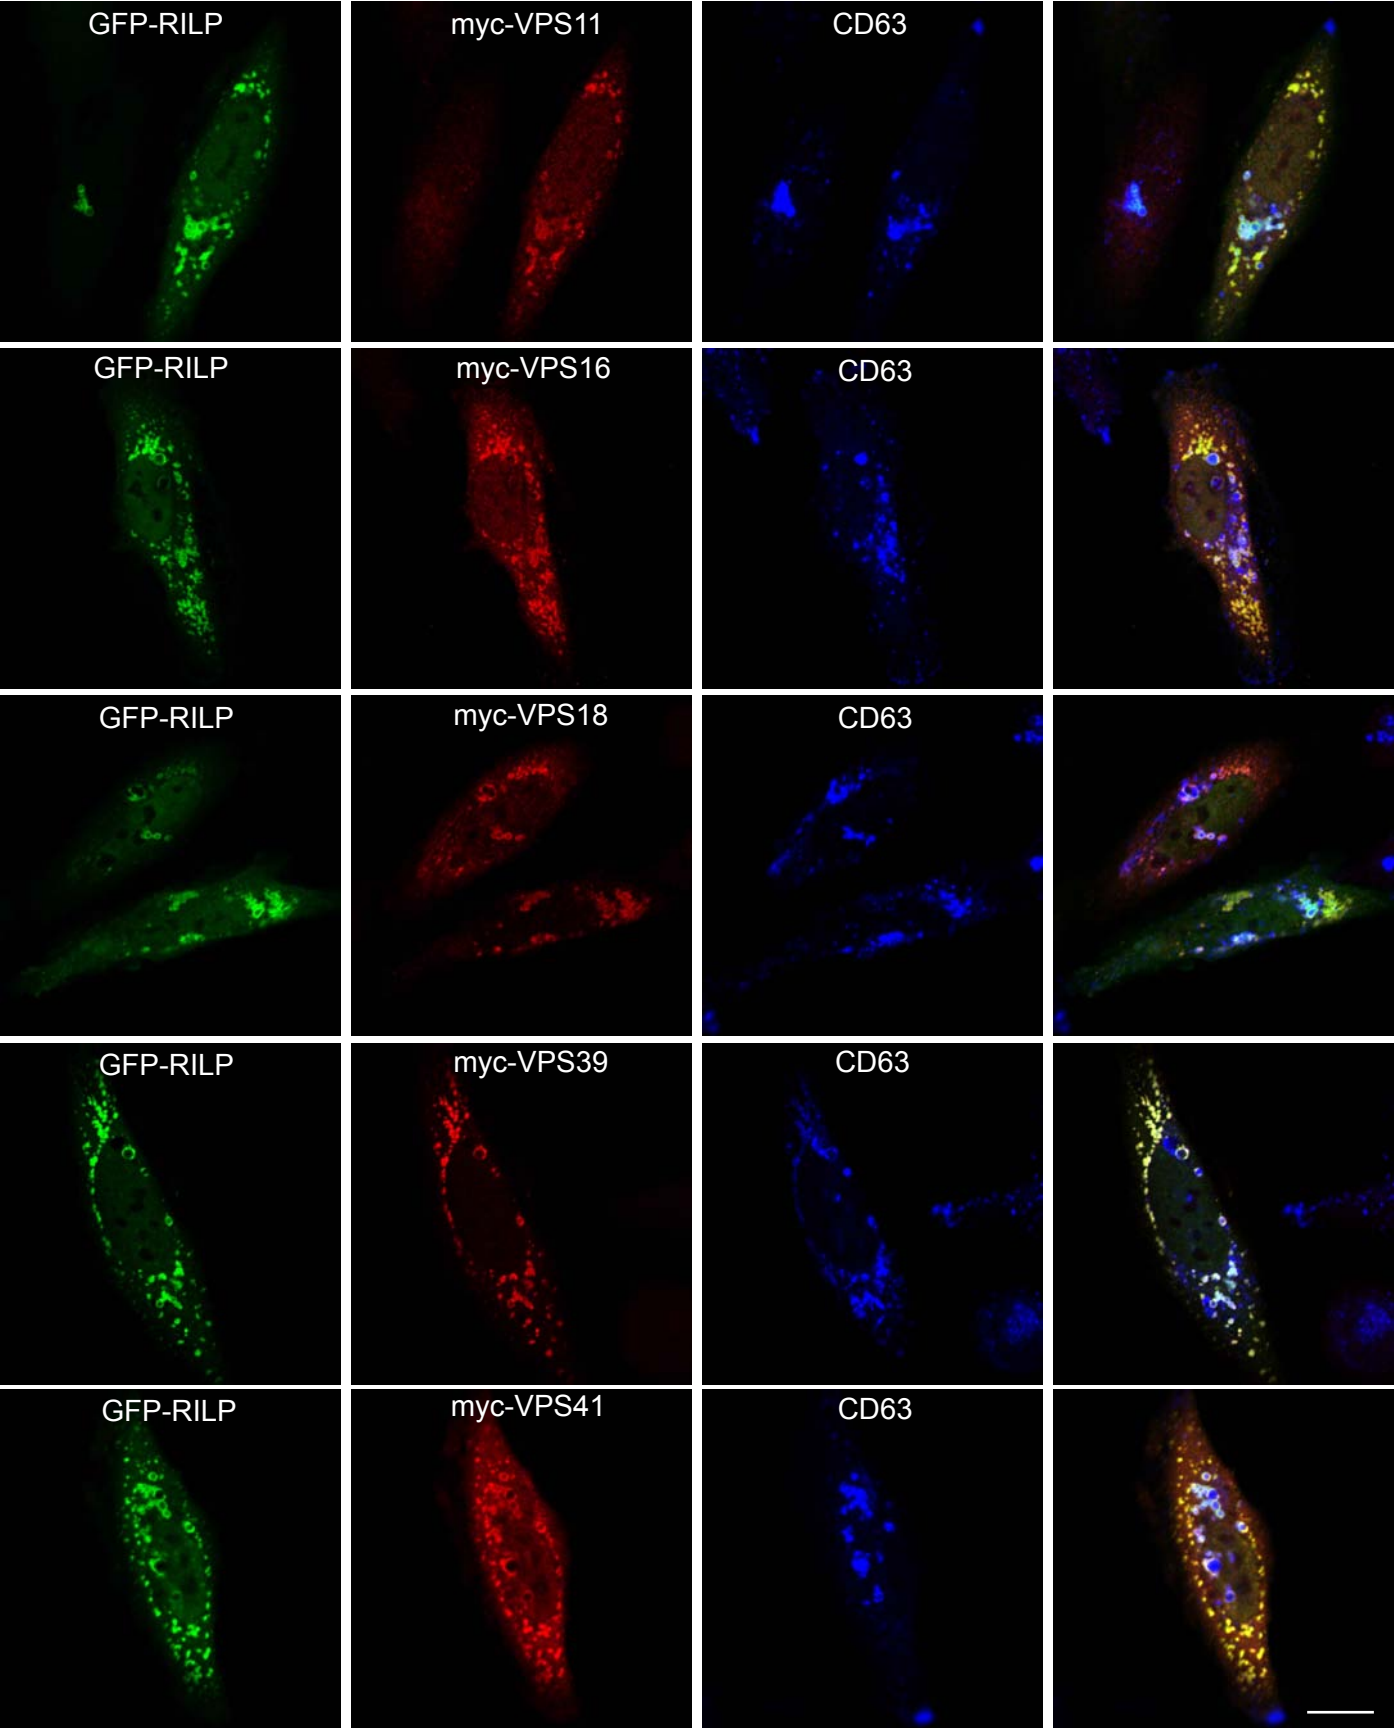

Figure s3

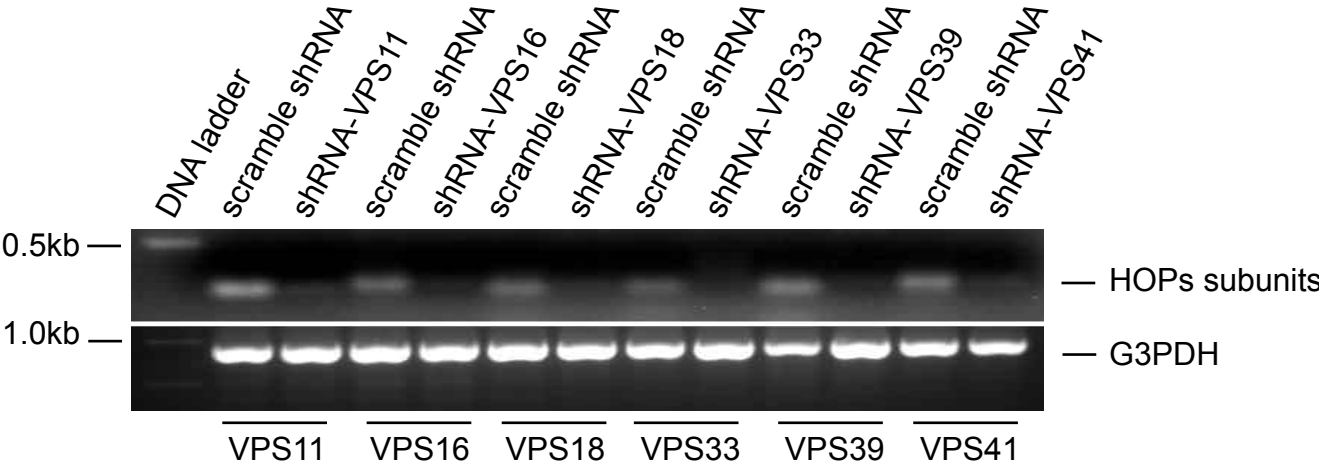

Figure s4

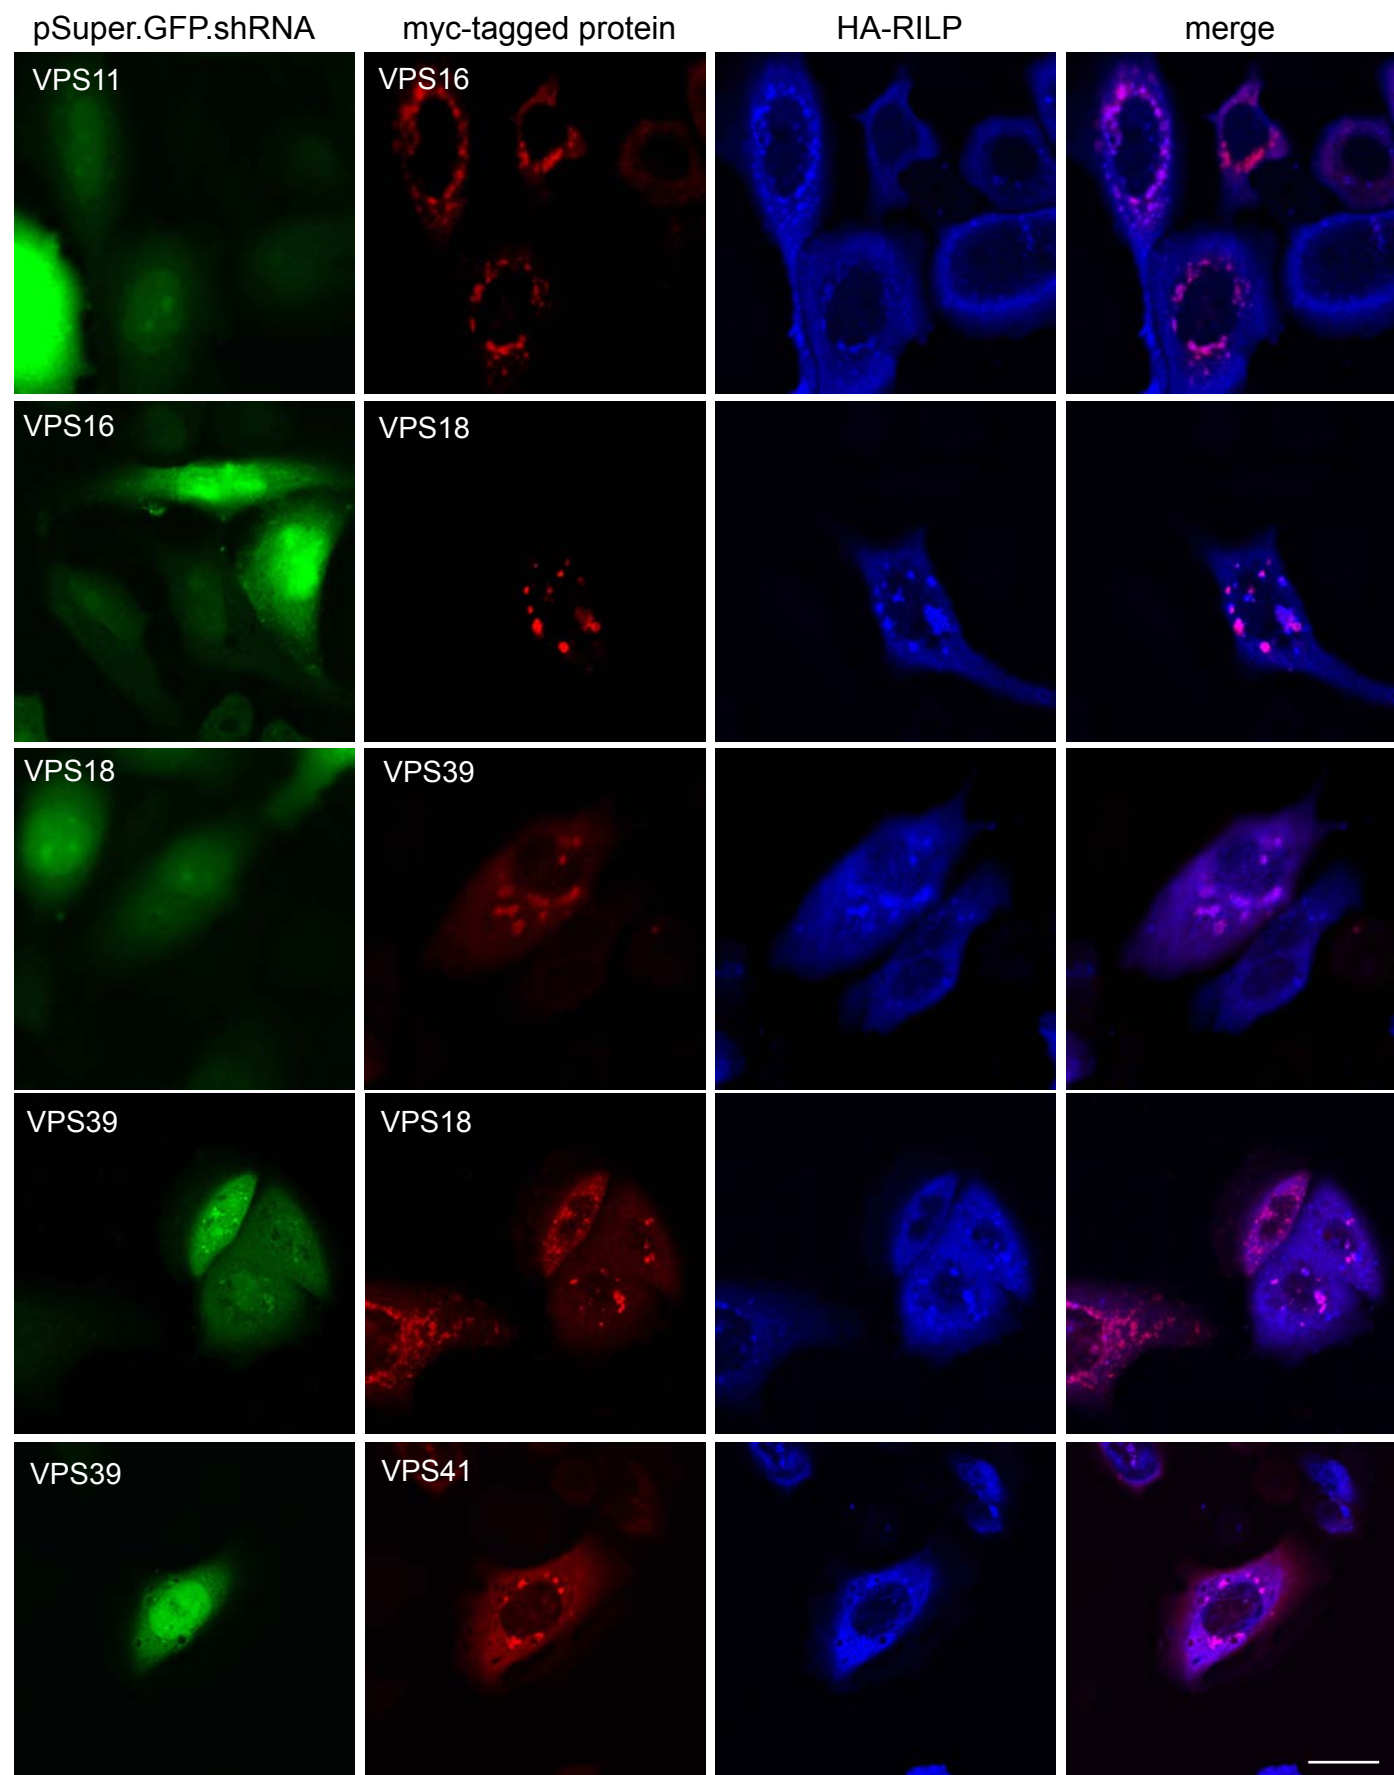



Figure s5

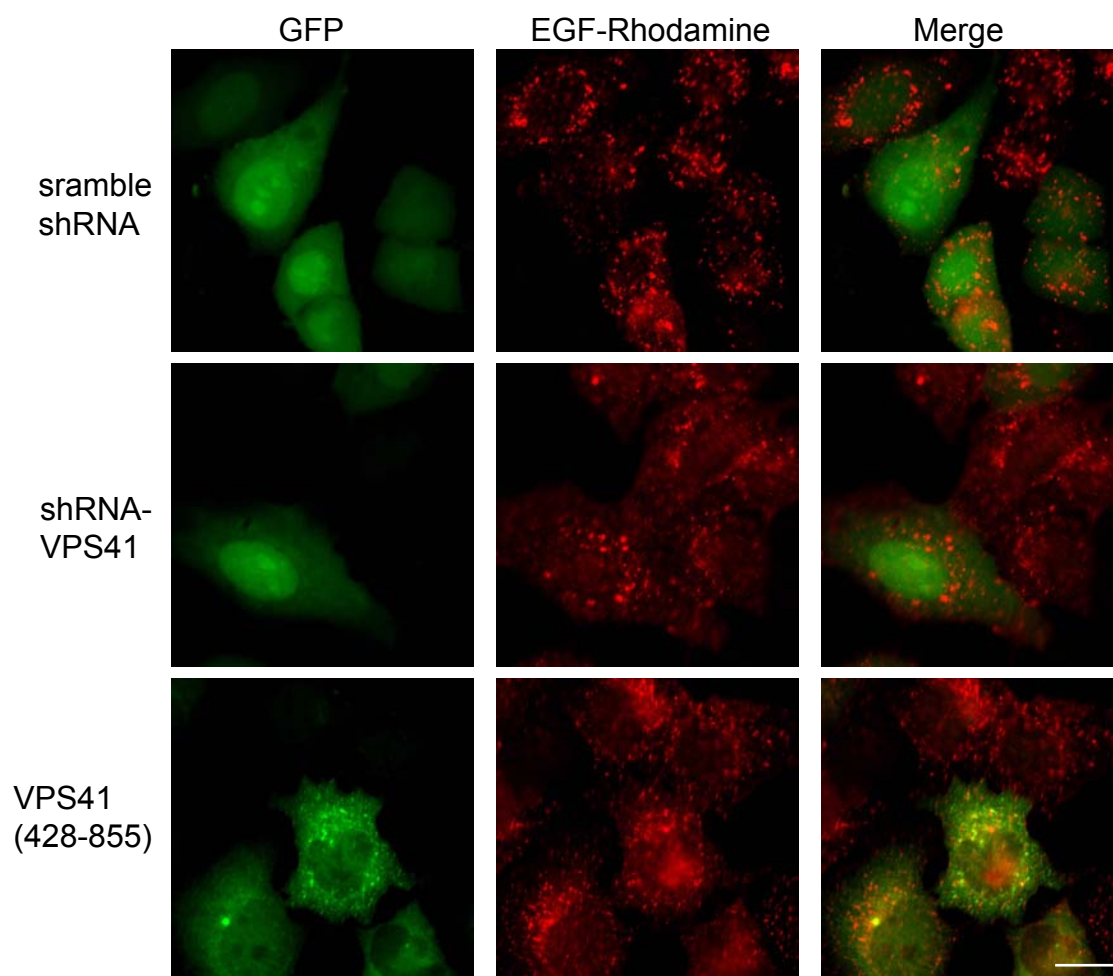

Figure s6

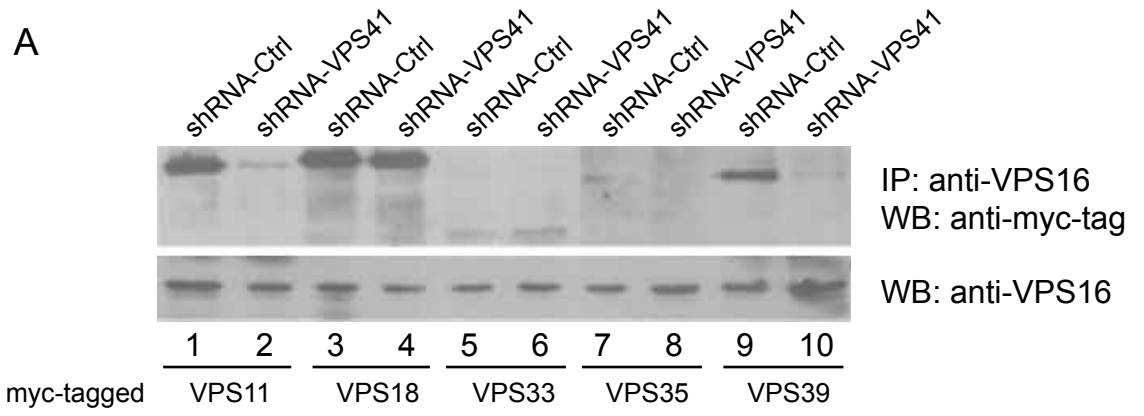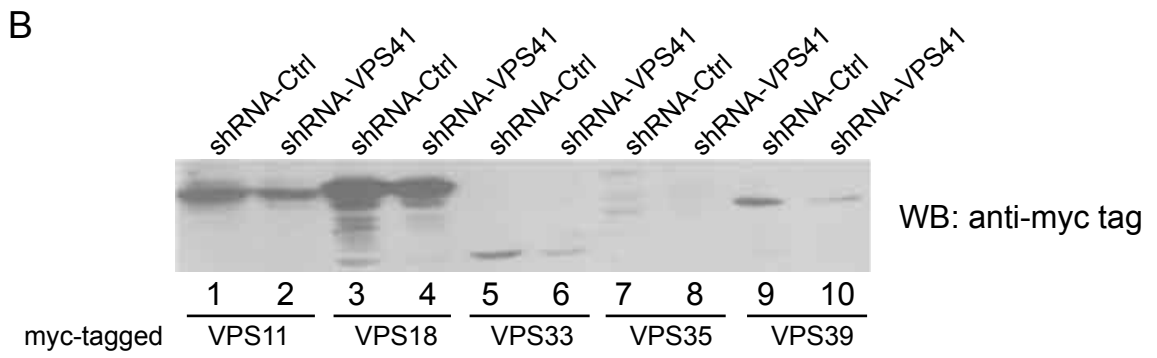

Figure s7

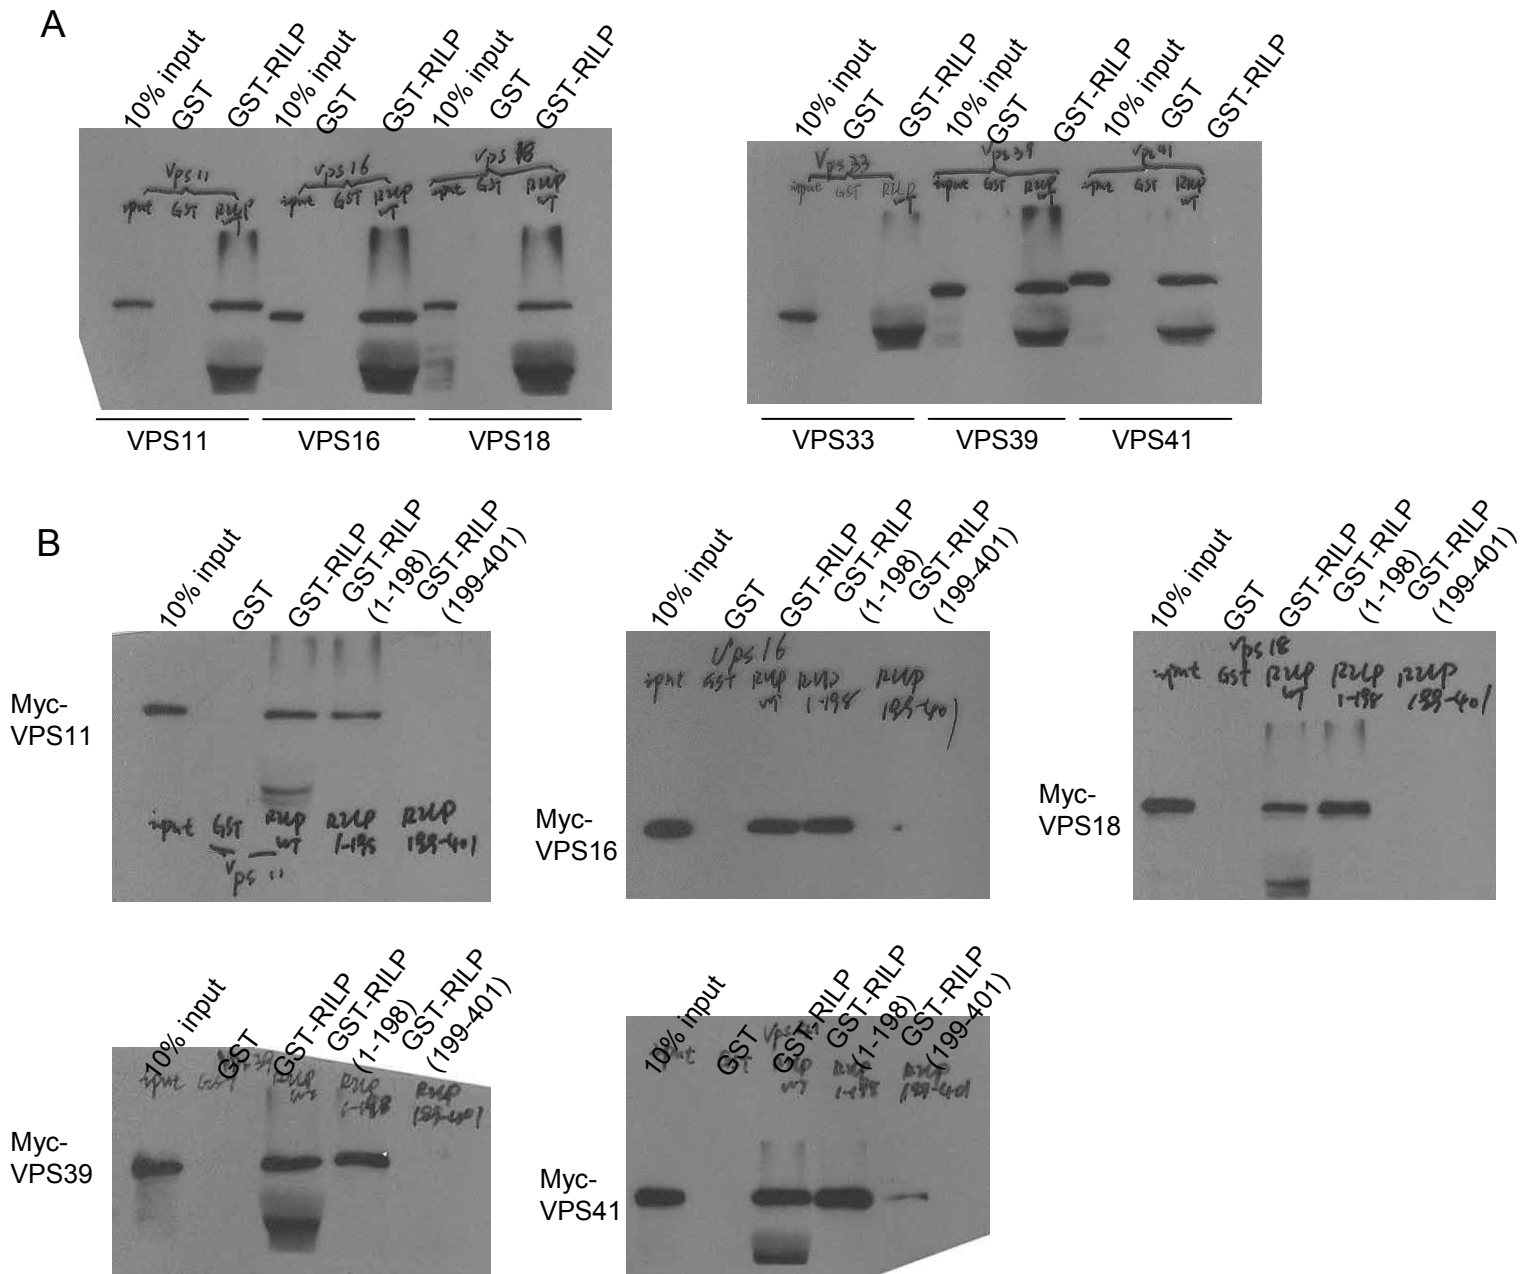

Figure s8

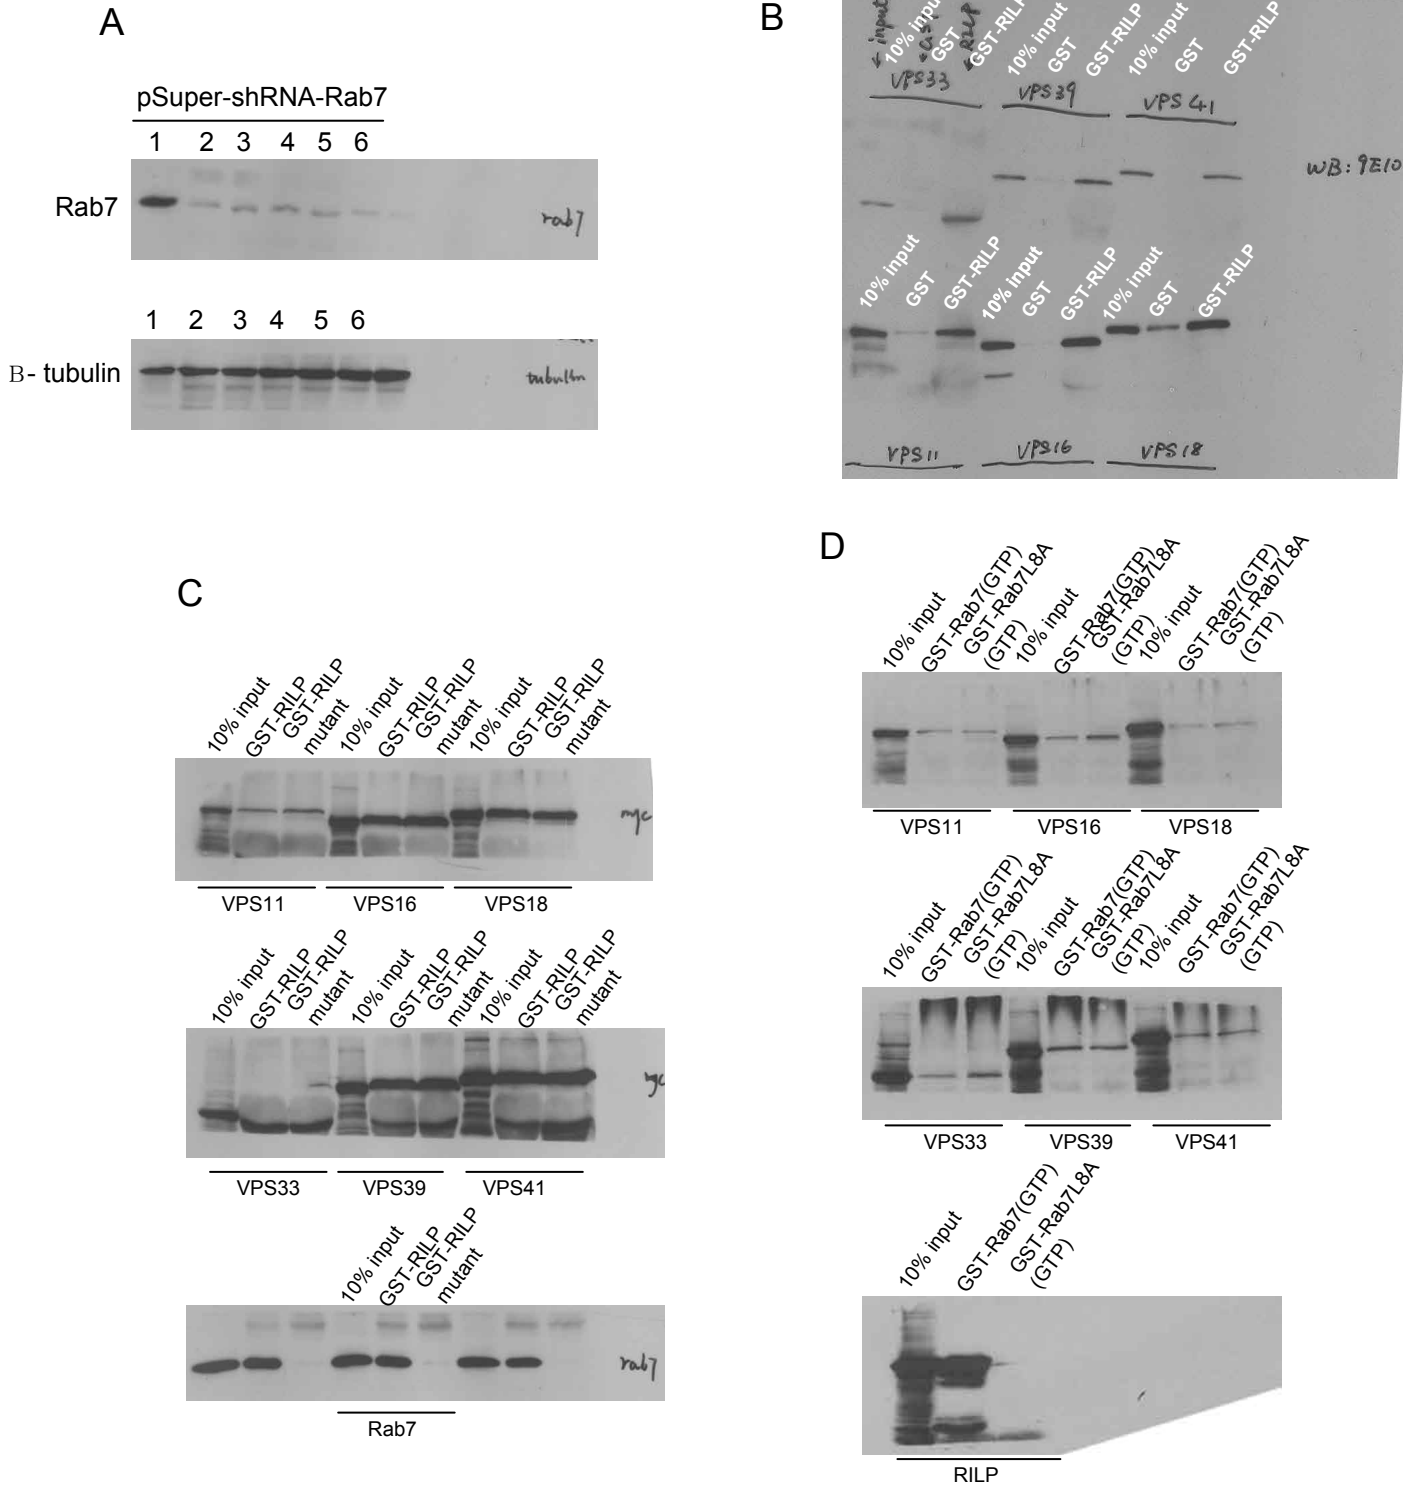

Figure s9

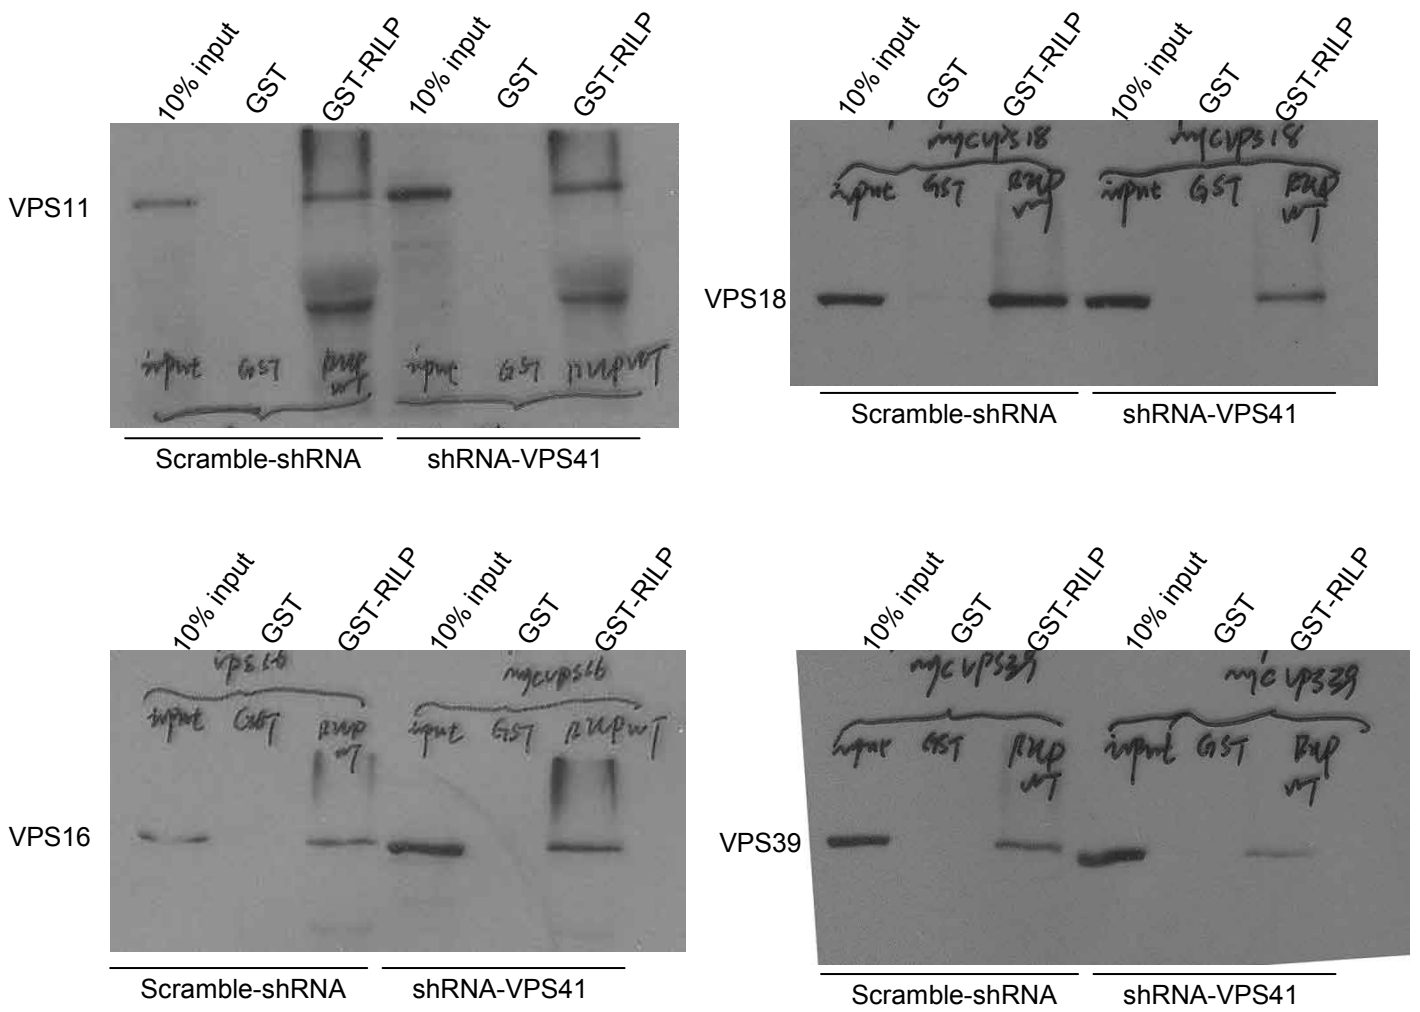

Figure s10

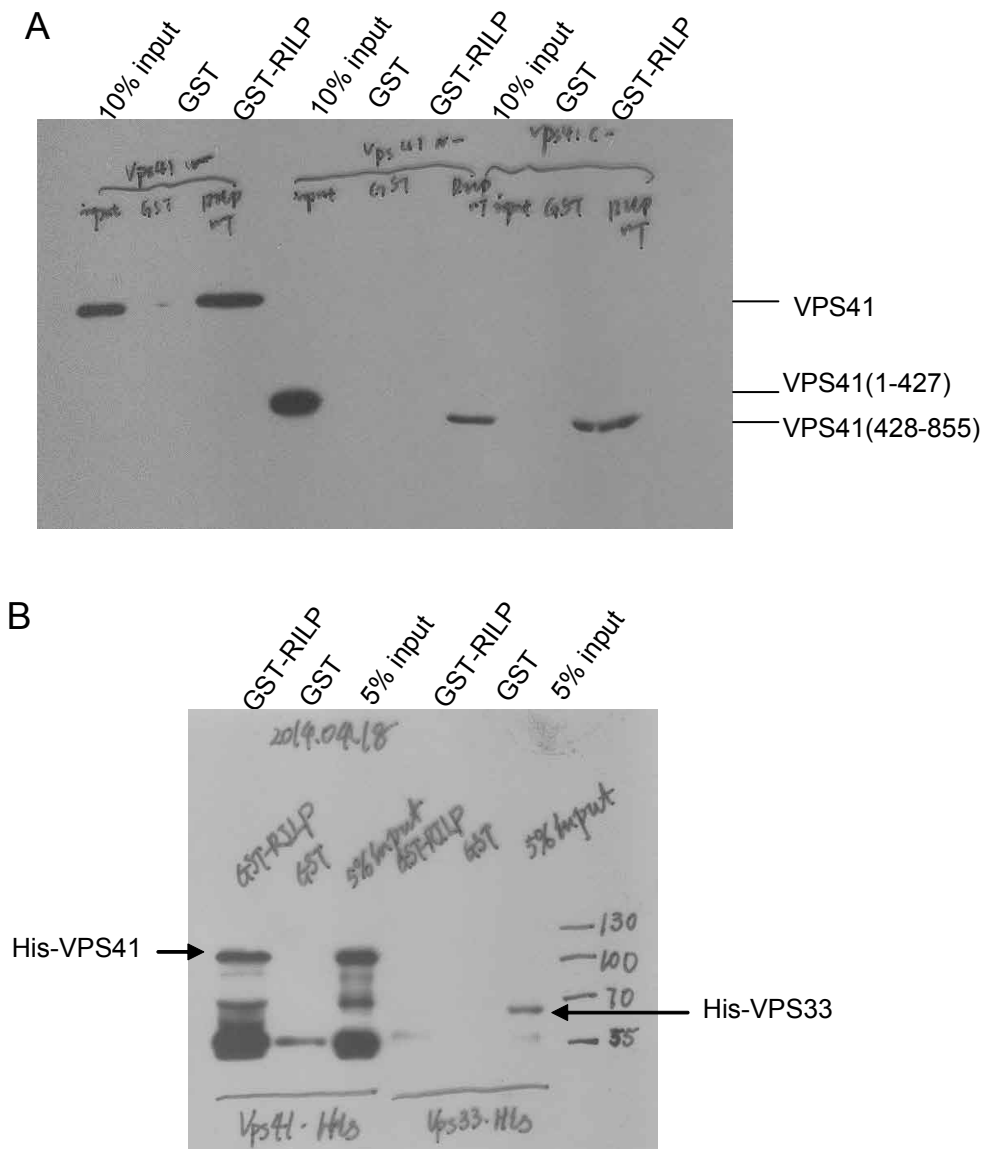

Figure s11

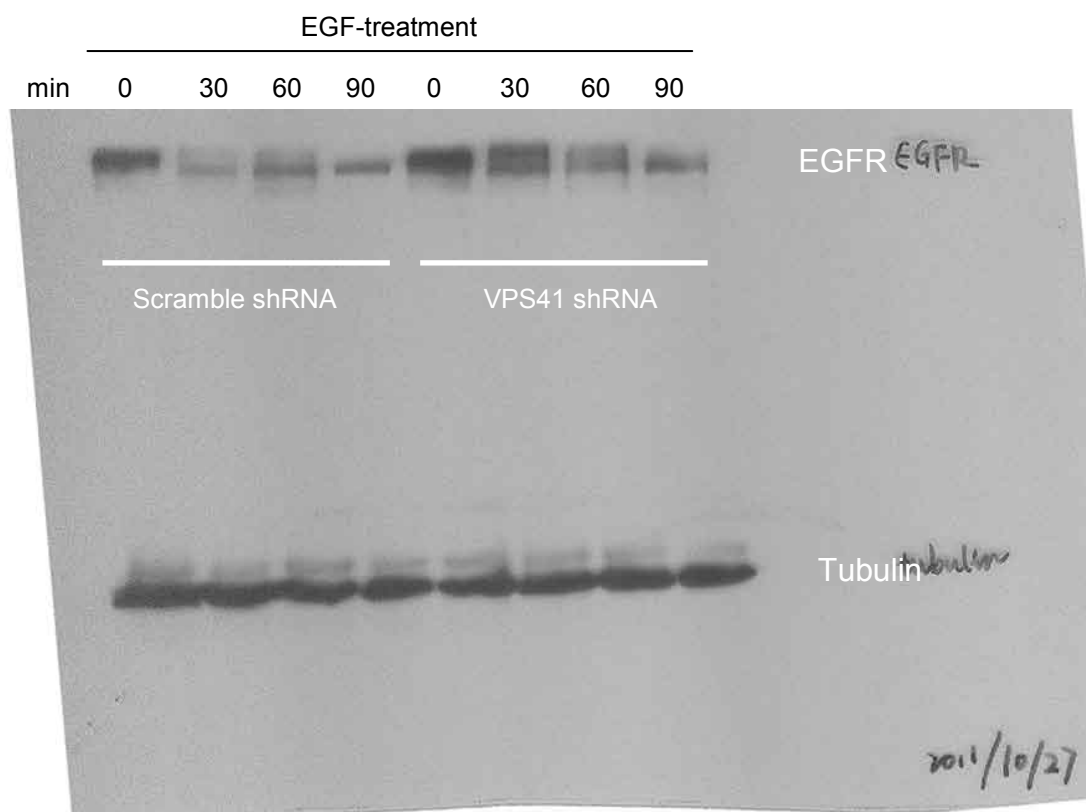

Supplement: srep07282-s1.pdf [file srep07282-s1.pdf]
